# Supplementary material for: Mechanism of CXCL8 regulation of methionine metabolism to promote angiogenesis in gliomas
Source: Discov Oncol. 2024 Nov 2;15:614. doi: 10.1007/s12672-024-01467-2 (PMC11531453; doi:10.1007/s12672-024-01467-2)
Supplement: Supplementary file 2 — Additional file2 (XLSX 21 KB) [file 12672_2024_1467_MOESM2_ESM.xlsx]

## Sheet: Table S1 Differentially express
Table S1 Differentially expressed genes in U251 and U251-M cells
Gene name	LogFC	LogCPM	Pvalue	FDR	Level
CXCL8	4.68569	5.23568	7.27e-139	1.01e-134	Increased
NPY1R	-3.47039	6.30835	6.06e-115	4.22e-111	Decreased
HLA-B	2.64079	6.54064	4.84e-71	2.25e-67	Increased
CCND1	2.06495	8.98804	2.78e-55	9.68e-52	Increased
NPIPB5	-2.4702	5.84949	1.19e-54	3.32e-51	Decreased
STC2	3.40741	4.18643	2.09e-45	4.16e-42	Increased
NT5E	2.22305	7.54555	1.73e-44	3.02e-41	Increased
HRH1	4.86046	3.26223	5.38e-41	8.33e-38	Increased
COL14A1	-2.15288	5.51571	3.49e-40	4.87e-37	Decreased
TIMP3	2.89746	3.51502	3.79e-35	4.4e-32	Increased
NOG	4.46115	1.85782	2.93e-34	2.72e-31	Increased
COL17A1	2.74504	4.94761	3.61e-34	3.15e-31	Increased
EDN1	2.34083	4.34719	3.9e-33	2.71e-30	Increased
PLXNA2	2.08203	4.59304	1.53e-31	9.72e-29	Increased
PI15	-2.72194	3.81975	1.04e-30	6.32e-28	Decreased
SLC2A12	-2.70563	5.38772	5.13e-29	2.75e-26	Decreased
F3	2.24107	4.87417	2.31e-28	1.07e-25	Increased
COL13A1	2.61189	5.04274	6.33e-28	2.76e-25	Increased
SOX21	-2.03635	4.64165	6.29e-26	2.66e-23	Decreased
RPLP0P2	6.48965	0.00589142	1.59e-25	6.51e-23	Increased
LRATD2	2.31528	4.93601	5.58e-25	2.16e-22	Increased
ADAM23	-2.11159	4.11462	1.46e-24	5.22e-22	Decreased
GPM6B	-2.34448	4.60064	2.74e-24	9.09e-22	Decreased
CFH	2.08727	4.65205	8.84e-23	2.74e-20	Increased
HMCN1	-2.04058	6.19628	1.06e-21	3.14e-19	Decreased
SOX21-AS1	-2.1664	3.61743	1.44e-21	4.18e-19	Decreased
SPOCK1	2.4252	3.04114	3.3e-21	9.2e-19	Increased
FOSL1	2.06682	7.48474	8.67e-21	2.37e-18	Increased
KRT13	-2.97012	3.95155	3.63e-20	9.55e-18	Decreased
GALNT17	-2.18119	3.2746	5.7e-20	1.47e-17	Decreased
BASP1	-2.71888	3.42027	6.57e-19	1.45e-16	Decreased
FDCSP	8.76881	-0.871718	8.71e-19	1.9e-16	Increased
NAV3	2.0392	3.86847	2.35e-18	5.04e-16	Increased
CXCL14	3.51088	3.88621	5.86e-18	1.18e-15	Increased
GLDN	-3.85683	1.36184	1.02e-17	1.97e-15	Decreased
AC069288.1	-2.38333	5.24805	1.52e-16	2.64e-14	Decreased
AOX1	3.23189	1.72539	2.12e-15	3.15e-13	Increased
MGLL	2.79456	1.61787	2.64e-15	3.88e-13	Increased
PEX5L	-5.26666	-0.834696	6.92e-15	9.92e-13	Decreased
FAT2	-3.59533	1.49423	4.27e-14	5.5e-12	Decreased
OLFML2A	-2.17884	2.36063	5.97e-14	7.43e-12	Decreased
PALM	-3.5827	1.14445	9.98e-14	1.2e-11	Decreased
BTG2	-2.09815	2.71761	1.58e-13	1.81e-11	Decreased
LRRN1	-2.85393	1.37679	1.81e-13	2.07e-11	Decreased
ZNF423	-2.76943	2.8903	2.27e-13	2.53e-11	Decreased
FAM133A	2.43817	2.46667	3.87e-13	4.15e-11	Increased
PTPRZ1	-2.4163	2.47403	3.93e-13	4.18e-11	Decreased
MT-TA	2.11693	2.41259	3.97e-13	4.19e-11	Increased
AC005224.2	-5.476	-0.992729	4.57e-13	4.79e-11	Decreased
MT-TS1	3.35018	0.988312	5.27e-13	5.36e-11	Increased
NELL2	-2.71468	0.834441	1.66e-12	1.56e-10	Decreased
MMP7	-3.26222	0.12679	3.12e-11	2.6e-09	Decreased
CXCL3	2.31745	1.06529	3.87e-11	3.19e-09	Increased
SERPINA3	-6.31931	-0.710837	3.92e-11	3.21e-09	Decreased
AC073365.1	3.6896	1.73893	4.22e-11	3.4e-09	Increased
CP	-4.20849	-0.430416	7.58e-11	5.81e-09	Decreased
AC021134.1	-2.81766	0.889471	9.58e-11	7.29e-09	Decreased
RAB11FIP4	-2.44516	2.21076	1.53e-10	1.1e-08	Decreased
AC021218.1	2.89409	0.0130222	3.46e-10	2.26e-08	Increased
SEMA7A	2.32585	2.56153	4.18e-10	2.66e-08	Increased
EFHD1	-2.58367	2.28504	2.57e-09	1.39e-07	Decreased
ENPP5	-2.76516	0.441762	3.9e-09	2.01e-07	Decreased
DUSP6	2.10444	2.13048	7.89e-09	3.82e-07	Increased
ZNF488	-2.1795	0.729627	1.06e-08	5.01e-07	Decreased
LIPG	-2.70671	0.353156	1.41e-08	6.48e-07	Decreased
AC008687.6	2.74513	1.0402	1.75e-08	7.9e-07	Increased
MT-TM	2.45462	2.89034	1.82e-08	8.16e-07	Increased
AC004551.1	3.62282	2.29024	3.08e-08	1.32e-06	Increased
SLC29A4	-2.1701	0.230784	4.25e-08	1.74e-06	Decreased
RN7SL5P	-3.51591	0.242581	6.11e-08	2.4e-06	Decreased
UCKL1-AS1	2.19134	-0.351295	6.71e-08	2.62e-06	Increased
LOXL1-AS1	-2.26647	0.564822	1.6e-07	5.69e-06	Decreased
SHC4	2.10386	2.2538	2.68e-07	9.07e-06	Increased
EPPK1	2.75507	-0.31456	2.89e-07	9.74e-06	Increased
REEP1	-3.82974	-0.721439	4.34e-07	1.4e-05	Decreased
RN7SL4P	-4.2786	0.746034	4.34e-07	1.4e-05	Decreased
MT-TY	2.0555	0.231814	5.03e-07	1.6e-05	Increased
PLEKHS1	-3.042	-0.514245	5.63e-07	1.77e-05	Decreased
MT-TD	2.00826	2.94036	6.11e-07	1.91e-05	Increased
ACOX2	2.26685	-0.544116	6.36e-07	1.98e-05	Increased
ZNF542P	2.23226	1.14109	6.98e-07	2.15e-05	Increased
THSD7A	-2.05306	0.124156	7.45e-07	2.27e-05	Decreased
RNU6-26P	-2.08771	-0.479769	9.89e-07	2.89e-05	Decreased
AC016949.1	-2.83838	-0.364823	1.15e-06	3.3e-05	Decreased
RFX8	2.0685	1.00494	1.4e-06	3.93e-05	Increased
RYR2	3.74985	-0.373605	1.46e-06	4.08e-05	Increased
SEMA6A	-2.65892	2.12513	1.78e-06	4.88e-05	Decreased
FENDRR	2.26713	-0.0890994	1.93e-06	5.27e-05	Increased
NAP1L3	2.60928	-0.480692	1.97e-06	5.34e-05	Increased
SPX	2.05767	0.375107	2.31e-06	6.19e-05	Increased
APLN	2.23447	0.103587	2.34e-06	6.25e-05	Increased
VAC14-AS1	-2.61275	-0.0559568	3.13e-06	8.08e-05	Decreased
GRIK4	-2.31821	1.17114	3.18e-06	8.18e-05	Decreased
NAT8L	-2.63182	0.276989	3.65e-06	9.22e-05	Decreased
GPR162	-2.01348	0.598792	4.58e-06	0.000113	Decreased
FGF1	2.72214	0.410118	4.77e-06	0.000116	Increased
TNFSF18	2.67113	1.23122	5.07e-06	0.000122	Increased
SPAG8	-2.11828	-0.503452	6.01e-06	0.000141	Decreased
BMPER	-2.33722	1.01416	6.46e-06	0.000149	Decreased
AC008105.1	-2.1955	0.326341	6.97e-06	0.000159	Decreased
ANKRD6	-2.85949	1.83792	8.58e-06	0.000191	Decreased
HS6ST3	2.20047	-0.23206	9.58e-06	0.00021	Increased
AL031282.2	-3.74061	3.40641	1.04e-05	0.000226	Decreased
MX2	3.7924	0.779132	1.17e-05	0.000248	Increased
AC020915.5	-7.94864	1.66796	1.45e-05	0.000299	Decreased
NMNAT2	-2.83632	4.1408	1.45e-05	0.0003	Decreased
SLC38A3	-4.16849	1.48275	1.67e-05	0.000335	Decreased
SLC25A27	-2.19591	0.954926	2.02e-05	0.000395	Decreased
C2orf15	-3.12396	0.0534909	2.29e-05	0.000439	Decreased
ZNF385D	2.89523	-0.371636	2.34e-05	0.000448	Increased
RN7SL2	-4.69776	4.26743	2.47e-05	0.000466	Decreased
RN7SK	-2.60501	2.6836	2.58e-05	0.000481	Decreased
AC009237.14	2.04536	-0.293853	2.62e-05	0.000487	Increased
PCDH1	2.03836	1.02235	2.68e-05	0.000496	Increased
AP006284.1	-2.19311	-0.436492	2.74e-05	0.000506	Decreased
NLRP1	2.09474	0.831289	2.93e-05	0.000536	Increased
LINC00578	-2.58743	-0.851765	4.18e-05	0.000719	Decreased
ST6GALNAC2	-4.99216	1.58888	6.08e-05	0.000965	Decreased
USP2	-2.10203	-0.011948	6.64e-05	0.00103389	Decreased
EHF	-2.22873	0.25657	6.7e-05	0.00104096	Decreased
ADAMTS7	-2.38475	0.535651	7e-05	0.00107875	Decreased
PLAC8	3.44958	-0.295365	8.48e-05	0.00127475	Increased
RAPGEF5	-2.32785	0.937538	8.72e-05	0.00129961	Decreased
EPB41L3	2.93162	-0.632758	0.000105	0.00151679	Increased
DUSP2	2.11264	-0.24142	0.00012	0.00169079	Increased
PEX11G	-2.07072	0.646499	0.000141	0.00194433	Decreased
VAV3	-2.1084	-0.584976	0.000143	0.00197084	Decreased
ADAMTS10	-2.07705	1.60858	0.000159	0.00213613	Decreased
ROBO4	3.56107	0.666109	0.000163	0.00218397	Increased
OAS2	2.56137	1.70127	0.000168	0.00223434	Increased
AC131160.1	-11.5282	1.78453	0.000181	0.00239441	Decreased
PCYT1B	-2.03761	1.2542	0.000184	0.00241778	Decreased
AL590428.1	-2.14952	0.101604	0.000193	0.00252409	Decreased
GAS6-AS1	-3.16863	1.70644	0.000222	0.00281892	Decreased
ISY1-RAB43	-10.8578	1.12101	0.000237	0.00296797	Decreased
MGP	-2.11158	1.3378	0.000252	0.00310937	Decreased
NPM1P9	2.00048	0.328562	0.000262	0.00319686	Increased
FAM122A	-10.1948	0.469003	0.000267	0.00322911	Decreased
RCAN2	-3.33962	-0.749601	0.000312	0.00365721	Decreased
COMMD3-BMI1	9.64221	-0.0730621	0.000322	0.00375816	Increased
AL662884.1	9.87401	0.152939	0.000337	0.00389845	Increased
RNF43	3.1471	-0.395726	0.000339	0.0039157	Increased
AC018512.1	8.60551	-1.06417	0.000425	0.00469221	Increased
PKD1L2	-2.75079	-0.852791	0.00043	0.00474379	Decreased
FLG	2.99574	-0.395528	0.00044	0.00481961	Increased
RN7SL1	-3.12482	4.19416	0.000559	0.00575442	Decreased
AC003102.1	-2.20836	-0.404733	0.000625	0.00633882	Decreased
ZNF696	2.26359	1.86894	0.000716	0.00709069	Increased
EMP1	2.64715	5.60726	0.000821	0.00788845	Increased
MARC4	3.34971	-0.147977	0.000852	0.00812978	Increased
HSPA6	2.10717	-0.416393	0.00101334	0.00935576	Increased
PCSK4	-2.49489	-1.10783	0.0010695	0.00977706	Decreased
IL1A	4.38548	-0.65964	0.00149729	0.0128213	Increased
AC005943.1	-3.58188	2.76002	0.00164657	0.0137797	Decreased
PIK3C2B	-2.08522	0.769274	0.00203297	0.0162312	Decreased
AC118553.2	3.91105	1.60666	0.00257233	0.0195834	Increased
LINC01291	4.03222	-0.334234	0.00277833	0.0207548	Increased
WNT2B	-2.36915	0.156428	0.0028201	0.0210105	Decreased
ZBTB38	-2.15341	4.5355	0.00313237	0.0227056	Decreased
IL23A	2.02557	0.193082	0.00388251	0.0270455	Increased
IFI44L	2.06675	4.46392	0.00443318	0.0298328	Increased
AL162258.1	2.15722	0.590654	0.00462798	0.0307262	Increased
SLC16A10	-2.1986	-0.254997	0.0050413	0.032851	Decreased
WNK4	2.36155	-0.475796	0.00679861	0.0413256	Increased
PALM2-AKAP2	-4.23951	3.25556	0.00814581	0.0475838	Decreased
TP53INP1	-2.16578	2.96397	0.00883344	0.0506659	Decreased
CMPK2	2.74392	0.547163	0.00921892	0.0524665	Increased
CREB3L1	2.08024	-0.287948	0.00997183	0.0557047	Increased
KCNIP1	2.79807	-0.0712365	0.0121223	0.0639	Increased
SERPIND1	2.63259	-0.491716	0.0128234	0.0665632	Increased
AL136531.2	3.44604	1.07098	0.0143643	0.0716519	Increased
AC022384.1	3.68393	2.93373	0.0160971	0.0780321	Increased
LINC01484	-2.60012	0.368418	0.0166024	0.0797446	Decreased
AP002990.1	-4.33888	6.24104	0.0169391	0.0809009	Decreased
CSGALNACT1	-2.26392	-0.699085	0.0176412	0.0833992	Decreased
AC106886.5	-3.1065	4.29631	0.0185883	0.0865258	Decreased
ELF3	-4.70941	-1.27041	0.0187217	0.0868568	Decreased
ARL2-SNX15	2.76471	0.376923	0.0211206	0.094251	Increased
KLHL11	-2.14729	2.37771	0.0236968	0.102085	Decreased
AC007192.1	2.58577	1.50958	0.0246562	0.104879	Increased
AC025154.2	-2.18091	-0.160291	0.0295951	0.119234	Decreased
RSAD2	3.59847	0.366091	0.0297238	0.119532	Increased
MPP4	2.29943	0.324031	0.0321201	0.125417	Increased
AC090517.5	-3.03836	-0.495174	0.0422148	0.152131	Decreased
SUSD4	-2.10113	-0.541707	0.0467315	0.16346	Decreased
MSI1	-2.16857	-0.800934	0.0478643	0.16613	Decreased
