# Supplementary material for: Mechanism of CXCL8 regulation of methionine metabolism to promote angiogenesis in gliomas
Source: Discov Oncol. 2024 Nov 2;15:614. doi: 10.1007/s12672-024-01467-2 (PMC11531453; doi:10.1007/s12672-024-01467-2)
Supplement: Supplementary file 3 — Additional file3 (XLSX 13 KB) [file 12672_2024_1467_MOESM3_ESM.xlsx]

## Sheet: go_enrich_all
Table S2 Results of GO enrichment analysis of differentially expressed genes in U251 and U251-M cells
ID	Description	BgRatio	Pvalue	P.adjust	Count	ONTOLOGY
GO:1901342	regulation of vasculature development	476/27224	5.21e-07	0.003223	34	BP
GO:0045765	regulation of angiogenesis	435/27224	4.87e-06	0.010867	30	BP
GO:0043583	ear development	286/27224	5.27e-06	0.010867	23	BP
GO:0014911	positive regulation of smooth muscle cell migration	94/27224	1.07e-05	0.0132857	12	BP
GO:0050808	synapse organization	266/27224	1.77e-05	0.0156126	21	BP
GO:0007416	synapse assembly	100/27224	2.03e-05	0.0157134	12	BP
GO:0030178	negative regulation of Wnt signaling pathway	215/27224	3.2e-05	0.0179914	18	BP
GO:0030198	extracellular matrix organization	434/27224	3.34e-05	0.0179914	28	BP
GO:0015804	neutral amino acid transport	47/27224	3.92e-05	0.0179914	8	BP
GO:1903522	regulation of blood circulation	348/27224	4.23e-05	0.0179914	24	BP
GO:0048562	embryonic organ morphogenesis	418/27224	4.49e-05	0.0179914	27	BP
GO:0043062	extracellular structure organization	490/27224	4.68e-05	0.0179914	30	BP
GO:0071229	cellular response to acid chemical	328/27224	4.7e-05	0.0179914	23	BP
GO:0007411	axon guidance	306/27224	4.71e-05	0.0179914	22	BP
GO:0097485	neuron projection guidance	307/27224	4.94e-05	0.0179914	22	BP
GO:0014910	regulation of smooth muscle cell migration	128/27224	5.56e-05	0.0191191	13	BP
GO:0008016	regulation of heart contraction	270/27224	6.81e-05	0.0213549	20	BP
GO:0060135	maternal process involved in female pregnancy	113/27224	6.9e-05	0.0213549	12	BP
GO:0014074	response to purine-containing compound	275/27224	8.76e-05	0.0250437	20	BP
GO:0007565	female pregnancy	365/27224	8.9e-05	0.0250437	24	BP
GO:0040036	regulation of fibroblast growth factor receptor signaling pathway	40/27224	9.97e-05	0.0268202	7	BP
GO:0033549	MAP kinase phosphatase activity	10/27224	0.000106	0.0272407	4	MF
GO:0060191	regulation of lipase activity	119/27224	0.000114	0.0282353	12	BP
GO:0060324	face development	86/27224	0.000129	0.0306266	10	BP
GO:0007409	axonogenesis	500/27224	0.000159	0.03426	29	BP
GO:0048705	skeletal system morphogenesis	333/27224	0.000161	0.03426	22	BP
GO:0051216	cartilage development	223/27224	0.000166	0.03426	17	BP
GO:0031668	cellular response to extracellular stimulus	428/27224	0.000166	0.03426	26	BP
GO:0040037	negative regulation of fibroblast growth factor receptor signaling pathway	20/27224	0.000173	0.0345637	5	BP
GO:0060688	regulation of morphogenesis of a branching structure	74/27224	0.000197	0.0380123	9	BP
GO:0000188	inactivation of MAPK activity	32/27224	0.000212	0.0387145	6	BP
GO:0090287	regulation of cellular response to growth factor stimulus	363/27224	0.000213	0.0387145	23	BP
GO:0050880	regulation of blood vessel size	209/27224	0.000243	0.041408	16	BP
GO:0048839	inner ear development	253/27224	0.000254	0.041408	18	BP
GO:0008201	heparin binding	189/27224	0.000256	0.041408	15	MF
GO:0010517	regulation of phospholipase activity	94/27224	0.00027	0.041408	10	BP
GO:1903670	regulation of sprouting angiogenesis	94/27224	0.00027	0.041408	10	BP
GO:0048018	receptor ligand activity	467/27224	0.000277	0.041408	27	MF
GO:0044706	multi-multicellular organism process	418/27224	0.000278	0.041408	25	BP
GO:0097060	synaptic membrane	278/27224	0.000289	0.041408	19	CC
GO:0002026	regulation of the force of heart contraction	34/27224	0.0003	0.041408	6	BP
GO:0033561	regulation of water loss via skin	34/27224	0.0003	0.041408	6	BP
GO:0035150	regulation of tube size	213/27224	0.000301	0.041408	16	BP
GO:2000181	negative regulation of blood vessel morphogenesis	172/27224	0.000314	0.0421928	14	BP
GO:0008514	organic anion transmembrane transporter activity	305/27224	0.000346	0.043427	20	MF
GO:0008083	growth factor activity	134/27224	0.000348	0.043427	12	MF
GO:0060349	bone morphogenesis	134/27224	0.000348	0.043427	12	BP
GO:1904754	positive regulation of vascular associated smooth muscle cell migration	23/27224	0.000351	0.043427	5	BP
GO:0051896	regulation of protein kinase B signaling	307/27224	0.000377	0.0457115	20	BP
GO:1905330	regulation of morphogenesis of an epithelium	177/27224	0.00042	0.0488793	14	BP
GO:0008038	neuron recognition	50/27224	0.000421	0.0488793	7	BP
GO:1901681	sulfur compound binding	310/27224	0.000427	0.0488793	20	MF
GO:0031012	extracellular matrix	407/27224	0.000448	0.0498215	24	CC
GO:0072001	renal system development	457/27224	0.000455	0.0498215	26	BP
GO:0002027	regulation of heart rate	119/27224	0.000464	0.0498215	11	BP
GO:0043409	negative regulation of MAPK cascade	289/27224	0.000467	0.0498215	19	BP
