# Supplementary material for: Mechanism of CXCL8 regulation of methionine metabolism to promote angiogenesis in gliomas
Source: Discov Oncol. 2024 Nov 2;15:614. doi: 10.1007/s12672-024-01467-2 (PMC11531453; doi:10.1007/s12672-024-01467-2)
Supplement: Supplementary file 4 — Additional file4 (XLSX 11 KB) [file 12672_2024_1467_MOESM4_ESM.xlsx]

## Sheet: Table S3 Results of KEGG enrich
Table S2 Results of KEGG enrichment analysis of differentially expressed genes in U251 and U251-M cells
ID	Description	BgRatio	pvalue	p.adjust	Count
ko04515	Cell adhesion molecules	177/26362	1.38e-06	0.000271	17
ko04010	MAPK signaling pathway	286/26362	1.84e-06	0.000271	22
ko04668	TNF signaling pathway	84/26362	3.27e-05	0.00240376	10
ko99995	Signaling proteins	205/26362	3.84e-05	0.00240376	16
ko04052	Cytokines and growth factors	206/26362	4.07e-05	0.00240376	16
ko04933	AGE-RAGE signaling pathway in diabetic complications	131/26362	7.7e-05	0.0037865	12
ko04014	Ras signaling pathway	306/26362	0.000167	0.00703754	19
ko04926	Relaxin signaling pathway	158/26362	0.000446	0.0149831	12
ko05215	Prostate cancer	96/26362	0.000502	0.0149831	9
ko04380	Osteoclast differentiation	97/26362	0.000542	0.0149831	9
ko05226	Gastric cancer	162/26362	0.000559	0.0149831	12
ko05223	Non-small cell lung cancer	64/26362	0.000838	0.0190373	7
ko01522	Endocrine resistance	103/26362	0.000839	0.0190373	9
ko05214	Glioma	84/26362	0.000919	0.019365	8
ko05206	MicroRNAs in cancer	154/26362	0.0012607	0.0247937	11
ko04012	ErbB signaling pathway	95/26362	0.00203861	0.0375869	8
ko04215	Apoptosis - multiple species	57/26362	0.00238492	0.0385067	6
ko04024	cAMP signaling pathway	244/26362	0.00242422	0.0385067	14
ko04974	Protein digestion and absorption	98/26362	0.0024801	0.0385067	8
ko05218	Melanoma	78/26362	0.00267317	0.0394293	7
ko04360	Axon guidance	224/26362	0.00309222	0.0434383	13
ko00536	Glycosaminoglycan binding proteins	202/26362	0.00364162	0.0488308	12
